# Supplementary material for: Use of an Outbred Rat Hepacivirus Challenge Model for Design and Evaluation of Efficacy of Different Immunization Strategies for Hepatitis C Virus
Source: PubMed Central journal article supplement (PMC7154631; doi:10.1002/hep.30894), 2019-10-11
Supplement: HEP-71-794-s001.pdf [file HEP-71-794-s001.pdf]

1 **Supplemental Figure Legends**

2

3 **Supplemental Figure 1: Blood CD4<sup>+</sup>IFN $\gamma$ <sup>+</sup> immune responses to RHV infection in**  
4 **unvaccinated rats.** 6 male Sprague-Dawley rats were infected with 10<sup>6</sup> viral particles of  
5 RHV by intravenous injection. PBMCs were isolated and stimulated with 8 pools of  
6 overlapping 15mer peptides spanning the entire polypeptide sequence of RHV. Blood  
7 samples were taken weekly for four weeks post-infection to chart a time-course of blood  
8 CD4<sup>+</sup>IFN $\gamma$ <sup>+</sup> responses by flow cytometry.

9

10 **Supplemental Figure 2: Spleen and liver immune responses to RHV infection in**  
11 **unvaccinated rats.** 6 male Sprague-Dawley rats were infected with 10<sup>6</sup> viral particles of  
12 RHV by intravenous injection. Four weeks post-infection rats were sacrificed; splenocytes  
13 were isolated from the spleen (A, B) and liver-infiltrating lymphocytes from the liver (C, D)  
14 and stimulated with 8 pools of overlapping peptides spanning the length of the RHV  
15 polypeptide. (E) Representative gating strategy for flow cytometry on Rat 1.

16

17 **Supplemental Figure 3: CD4<sup>+</sup>IFN $\gamma$ <sup>+</sup> cellular immune responses following vaccination of**  
18 **rats with an adenoviral vectored vaccine encoding the non-structural proteins of RHV**  
19 **(ChAd-NS).** Four male Sprague-Dawley rats were vaccinated with 10<sup>8</sup> infectious units per  
20 dose of ChAd-NS. PBMCs were isolated from blood drawn weekly from vaccinated rats and  
21 stimulated with four pools of peptides representing the non-structural regions of RHV. (A)  
22 shows the time-course of CD4<sup>+</sup>IFN $\gamma$ <sup>+</sup> responses for four weeks post-vaccination, as measured  
23 using flow cytometry; plotted are pooled responses against all four peptide pools for each rat.  
24 Mock-vaccinated rats are shown with hatched lines. (B) and (C) show the immune responses  
25 by flow cytometry four weeks post-vaccination against the four individual peptide pools as

26 shown, for splenocytes and liver-infiltrating lymphocytes respectively, with mock-vaccinated  
27 rats shown as squares.

28

29 **Supplemental Figure 4: Identification of immunodominant epitopes in infected and**  
30 **vaccinated rats.** IFN $\gamma$  ELISpots followed by flow cytometry were performed on splenocytes  
31 from infected (A) and vaccinated (B) rats to identify peptides responsible for CD8<sup>+</sup>IFN $\gamma$ <sup>+</sup>  
32 responses. Sub-pools of peptides and then individual peptides were screened and responses  
33 plotted as spot-forming units (SFU) per million splenocytes (ELISpot) or as % parent (flow  
34 cytometry, 4C) as shown.

35

36 **Supplemental Figure 5: Schema and summary of protective efficacy of ChAd-NS**  
37 **vaccination strategies against challenge with RHV.** Male Sprague-Dawley rats (n=6 per  
38 group) were vaccinated and challenged as described in Table 1. Vaccinations were  
39 administered by intramuscular injection into the right hind leg. Four weeks following  
40 vaccination RHV was administered by intravenous injection into a tail vein as shown in (A).  
41 Viraemia at each time-point obtained by quantitative PCR against a standard curve of RHV  
42 genomes of known concentration. Viraemia at (B) 28 days post-challenge and (C) at end of  
43 trial (approx. 150 days post-infection). (D) Summary of protective efficacy and aviraemia  
44 seen in each vaccination group. “ChAd-NS” represents combined results from groups (n=6  
45 each) challenged with 10<sup>5</sup> and 10<sup>6</sup> vp RHV respectively.

46

47 **Supplemental Figure 6: Effects on CD4<sup>+</sup>IFN $\gamma$ <sup>+</sup> cellular immunogenicity of different**  
48 **vaccination regimes.** Male Sprague-Dawley rats (n=6 per group) were vaccinated and  
49 challenged four weeks after final vaccination as described in Table 1. CD4<sup>+</sup>IFN $\gamma$ <sup>+</sup> responses

50 from PBMCs are shown (A) two days prior to infection (B) four weeks post-infection and (C)  
51 at end of study, and (D) for splenocytes at end of study.

52

53 **Supplemental Figure 7: Association of CD4<sup>+</sup>IFN $\gamma$ <sup>+</sup> and CD8<sup>+</sup>IFN $\gamma$ <sup>+</sup> cellular immune**  
54 **responses with protection.** Male Sprague-Dawley rats (n=6 per group) were vaccinated and  
55 challenged four weeks after final vaccination as described in Table 1. Rats were divided into  
56 two groups, "controllers" and "non-controllers", on the basis of possessing detectable  
57 viraemia or otherwise at end of trial. Associations of CD4<sup>+</sup>IFN $\gamma$ <sup>+</sup> responses from PBMCs are  
58 shown (A) two days prior to infection (B) four weeks post-infection and (C) at end of study.  
59 (D) Correlations between CD8<sup>+</sup>IFN $\gamma$ <sup>+</sup> liver-infiltrating lymphocyte or splenocyte responses  
60 and PBMC responses at EOT. (E) CD4<sup>+</sup>IFN $\gamma$ <sup>+</sup> and (F) CD8<sup>+</sup>IFN $\gamma$ <sup>+</sup> responses at end of study  
61 are shown for splenocytes and (G) liver-infiltrating lymphocytes.

62

63 **Supplemental Fig 8: Individual time-course of viraemia and PBMC immune responses**  
64 **in ChAd-NS-vaccinated and challenged rats which controlled infection.** Male Sprague-  
65 Dawley rats were vaccinated and challenged as described in Table 2. Blood cellular immune  
66 responses were obtained at each time-point by flow cytometry by stimulation with pools of  
67 peptides representing three regions, NS3, NS4 and NS5B. Viraemia was obtained by qPCR  
68 against a standard curve of RHV genome copies of known concentration on serum samples at  
69 indicated time-points.

70

71 **Supplemental Fig 9: Individual time-course of viraemia and blood cellular immune**  
72 **responses in ChAd-NS-vaccinated and challenged rats: non-controllers, breakthrough**  
73 **infections, and aviraemic.** Male Sprague-Dawley rats were vaccinated and challenged as  
74 described in Table 2. Blood cellular immune responses were obtained at each time-point by

75 flow cytometry by stimulation with pools of peptides representing three regions, NS3, NS4  
76 and NS5B. Viraemia was obtained by qPCR against a standard curve of RHV genome copies  
77 of known concentration on serum samples at indicated time-points. (A) Non-controllers; (B)  
78 Breakthrough infections; (C) Aviraemic.

79

80 **Supplemental Figure 10: Blood cellular immunogenicity against structural antigens of**  
81 **ChAd-S alone and in combination with ChAd-NS.** Male Sprague-Dawley rats (n=6 per  
82 group) were vaccinated by intramuscular injection with either ChAd-S, ChAd-NS or pre-  
83 mixed ChAd-S and ChAd-NS at a dose of  $10^8$  i.u. per distinct vaccine. Four weeks following  
84 vaccination rats were challenged by intravenous injection into the tail vein of  $10^5$  viral  
85 particles RHV. Blood cellular immune responses were compared by flow cytometry against  
86 structural antigens for single-vaccine versus combination groups for (A-C)  $CD4^+IFN\gamma^+$  and  
87 (D-E)  $CD8^+IFN\gamma^+$  cell types at timepoints indicated.

88

89 **Supplemental Figure 11: Blood cellular immunogenicity against non-structural antigens**  
90 **of ChAd-S alone and in combination with ChAd-NS.** Male Sprague-Dawley rats (n=6 per  
91 group) were vaccinated by intramuscular injection with either ChAd-S, ChAd-NS or pre-  
92 mixed ChAd-S and ChAd-NS at a dose of  $10^8$  i.u. per distinct vaccine. Four weeks following  
93 vaccination rats were challenged by intravenous injection into the tail vein of  $10^5$  viral  
94 particles RHV. Blood cellular immune responses were compared by flow cytometry against  
95 non-structural antigens for single-vaccine versus combination groups for (A-B)  $CD4^+IFN\gamma^+$   
96 and (C-D)  $CD8^+IFN\gamma^+$  cell types at timepoints indicated. Numbers above comparison groups  
97 represent p-values from ANOVA with Bonferroni's multiple comparisons test.

98

99 **Supplemental Figure 12: Spleen cellular immunogenicity of ChAd-S alone and in**  
100 **combination with ChAd-NS.** Male Sprague-Dawley rats (n=6 per group) were vaccinated  
101 by intramuscular injection with either ChAd-S, ChAd-NS or pre-mixed ChAd-S and ChAd-  
102 NS at a dose of  $10^8$  i.u. per distinct vaccine. Four weeks following vaccination rats were  
103 challenged by intravenous injection into the tail vein of  $10^5$  viral particles RHV.  $CD8^+IFN\gamma^+$   
104 Splenocyte responses were compared by flow cytometry against (A) structural and (B) non-  
105 structural antigens for single-vaccine versus combination groups at EOT by flow cytometry.  
106

Rat1

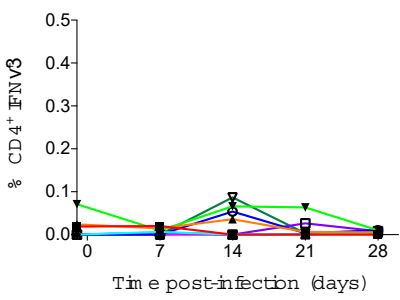

Rat2

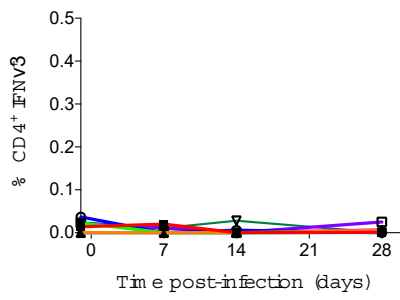

Rat3

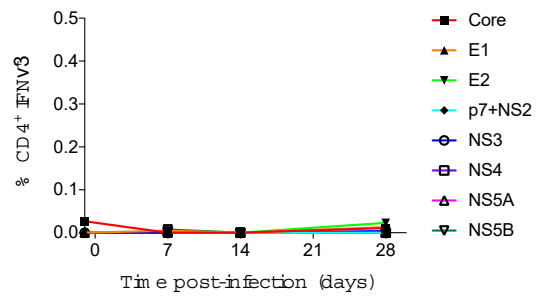

Rat4

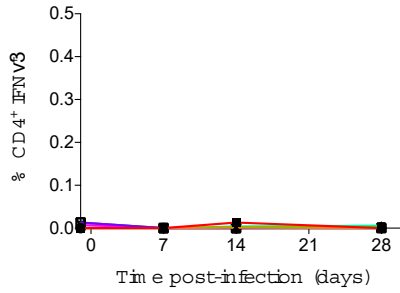

Rat5

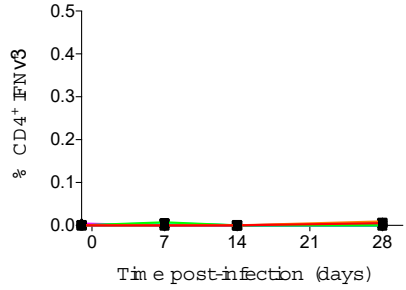

Rat6

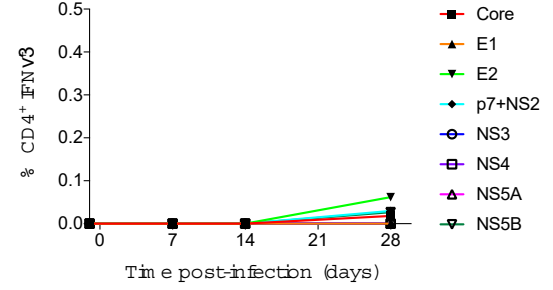

Supplemental Figure 1: Blood CD4<sup>+</sup>IFN $\gamma$  immune responses to RHV infection in unvaccinated rats. 6 male Sprague-Dawley rats were infected with  $10^6$  viral particles of RHV by intravenous injection. PBMCs were isolated and stimulated with 8 pools of 15mer peptides spanning the entire polypeptide sequence of RHV. Blood samples were taken weekly for four weeks post-infection to chart a time-course of blood CD4<sup>+</sup>IFN $\gamma$  responses by flow cytometry.

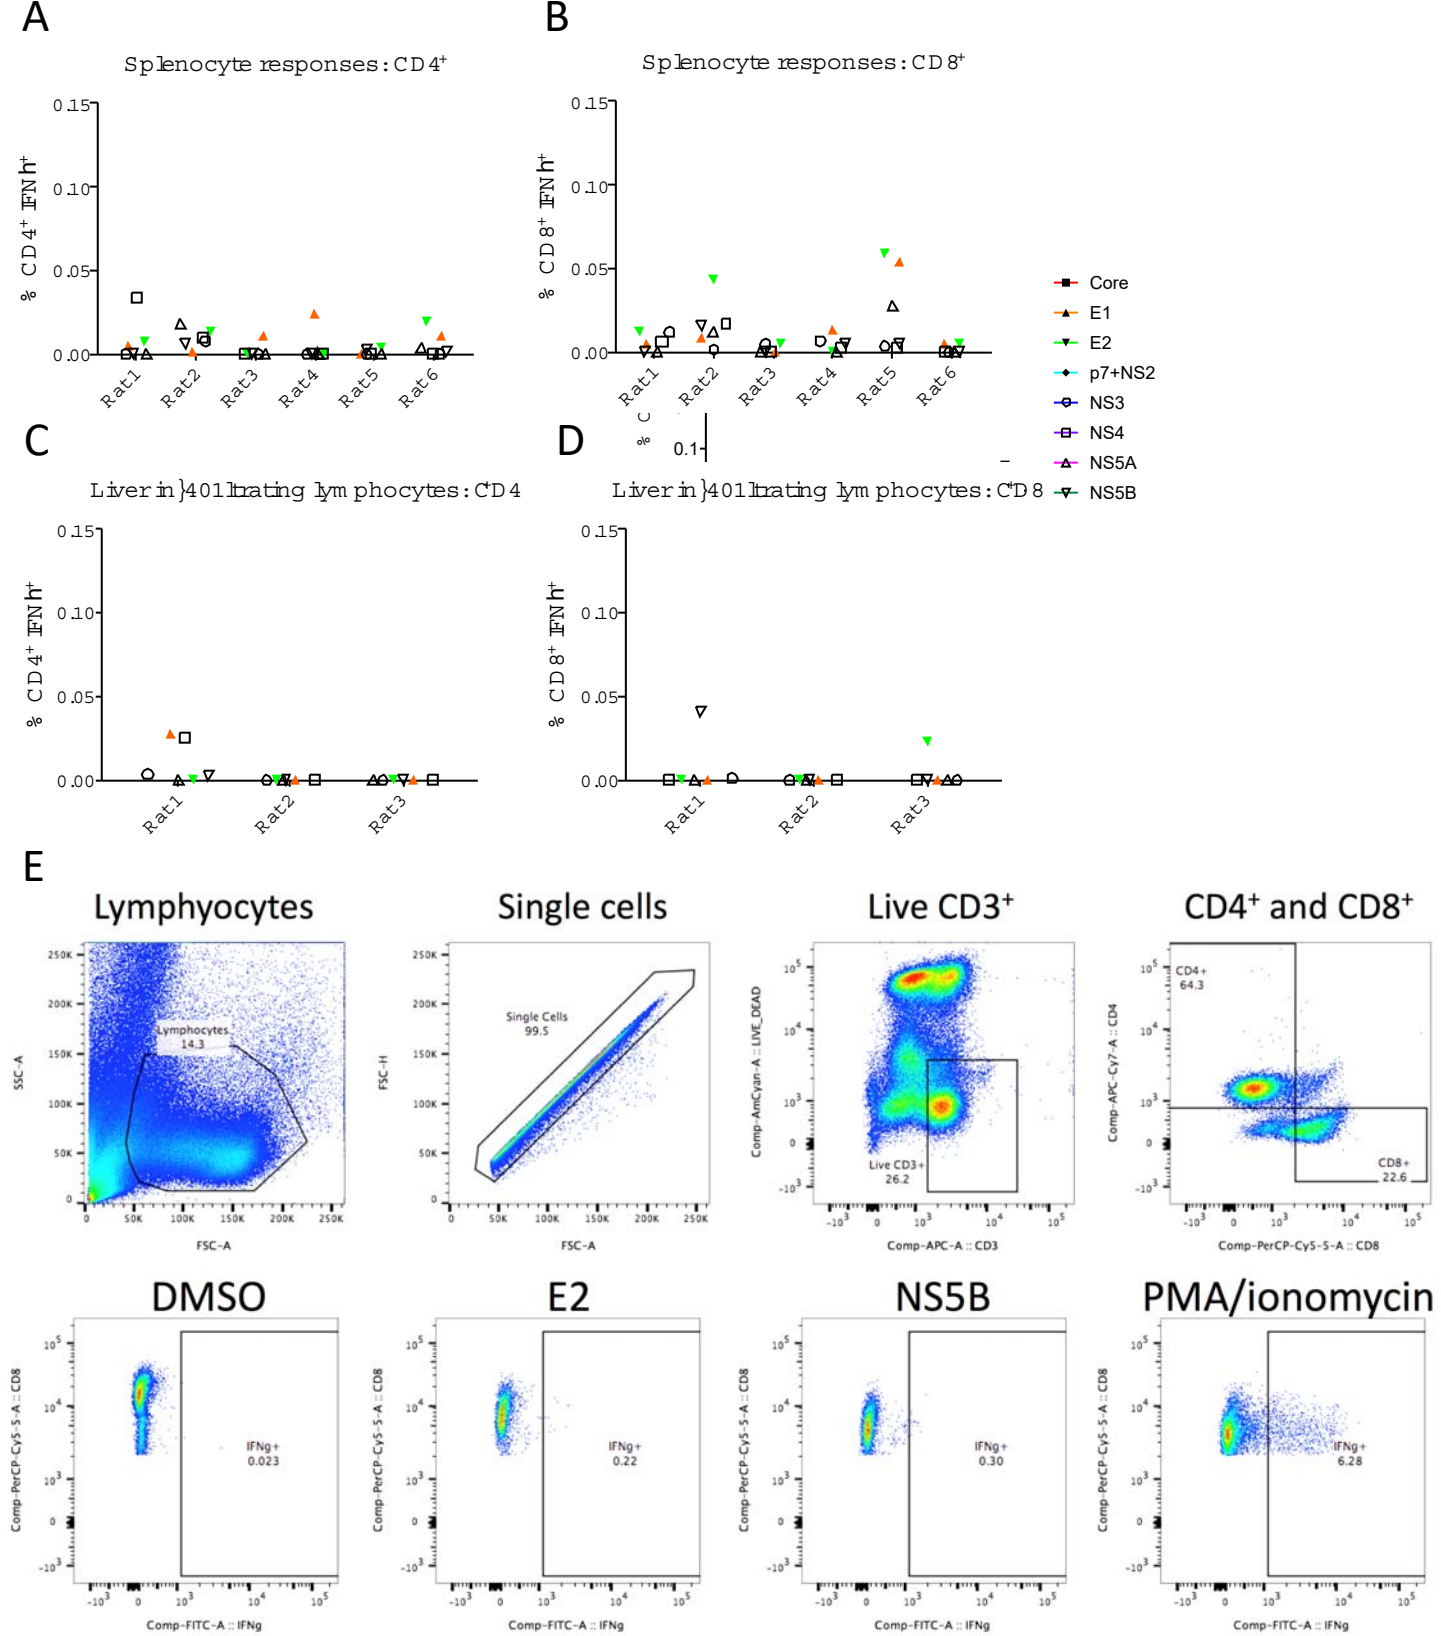

### Supplemental Figure 2: Spleen and liver immune responses to RHV infection in unvaccinated rats

6 male Sprague-Dawley rats were infected with  $10^6$  viral particles of RHV by intravenous injection. Four weeks post-infection rats were sacrificed, splenocytes were isolated from the spleen (A, B) and liver in }401 gating lymphocytes from the liver (C, D) and stimulated with 8 pools of peptides spanning the length of the RHV polypeptide. (E) Representative gating strategy for flow cytometry on Rat 1.

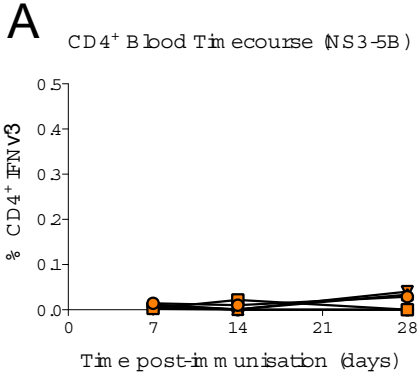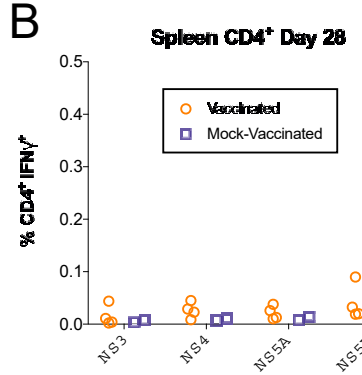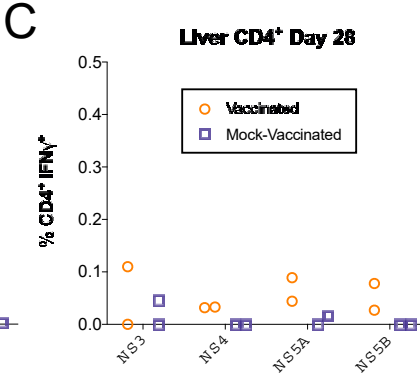

Supplemental Figure 3: CD4<sup>+</sup> IFN $\gamma$  cellular immune responses follow ing vaccination of rats with an adenoviral vectored vaccine encoding the non-structural proteins of FCHV (NS) Four male Sprague Dawley rats were vaccinated with  $10^8$  infectious units per dose of an adenoviral (ChAdOx1) vectored vaccine encoding the non-structural proteins of RHV. PBMCs were isolated from blood drawn weekly from vaccinated rats and stimulated with four pools of peptides representing the non-structural regions of RHV. (A) shows the time-course of CD4<sup>+</sup> IFN $\gamma$  responses for four weeks post-vaccination, as measured using flow cytometry, plotted are pooled responses against all four peptide pools for each rat. Mock-vaccinated rats are shown with hatched lines. (B) and (C) show the immune responses by flow cytometry four weeks post-vaccination against the four individual peptide pools as shown, for splenocytes and liver-infiltrating lymphocytes respectively, with mock-vaccinated rats shown as squares.



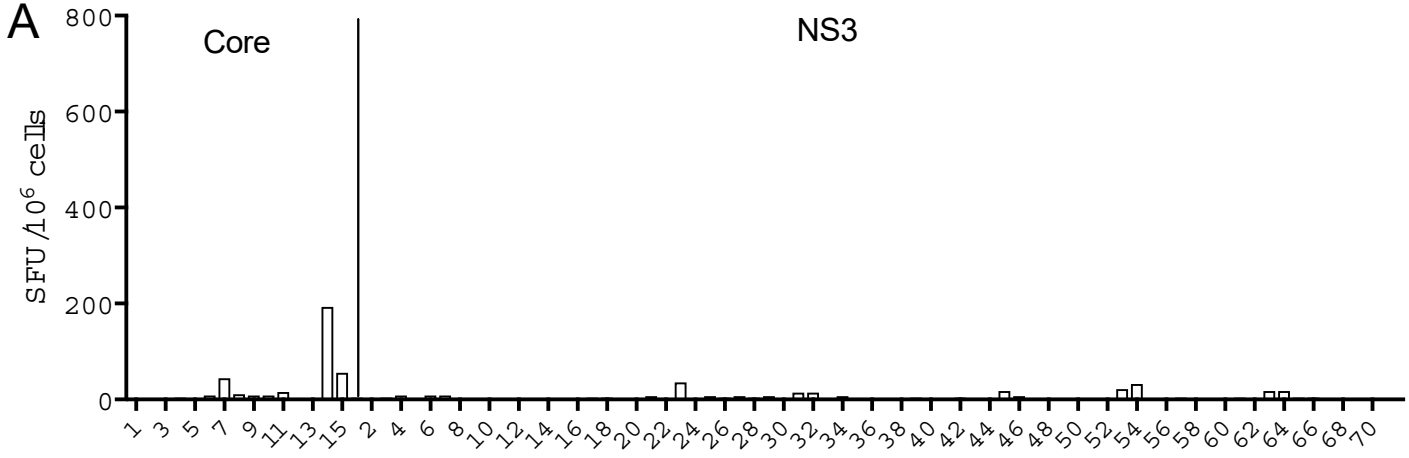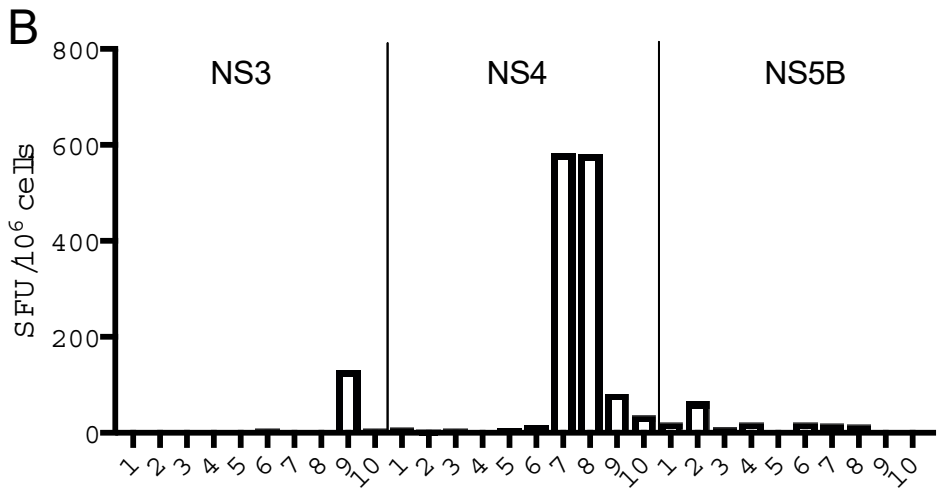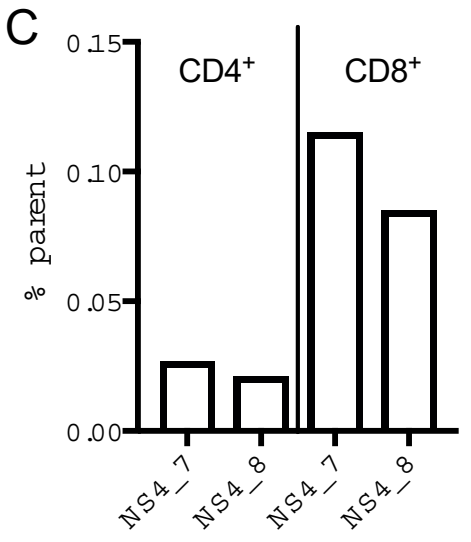

Supplemental Figure 4: Identification of dominant epitopes in infected and vaccinated rats. IFN $\gamma$  ELISpot and then cytometry were used on splenocytes from infected (A) and vaccinated (B) rats to identify peptides responsible for CD8<sup>+</sup> IFN $\gamma$  responses. Sub-pools of peptides and then individual peptides were screened and responses plotted as spot-forming units (SFU) per million splenocytes (ELISpot) or as % parent (cytometry, C) as shown.

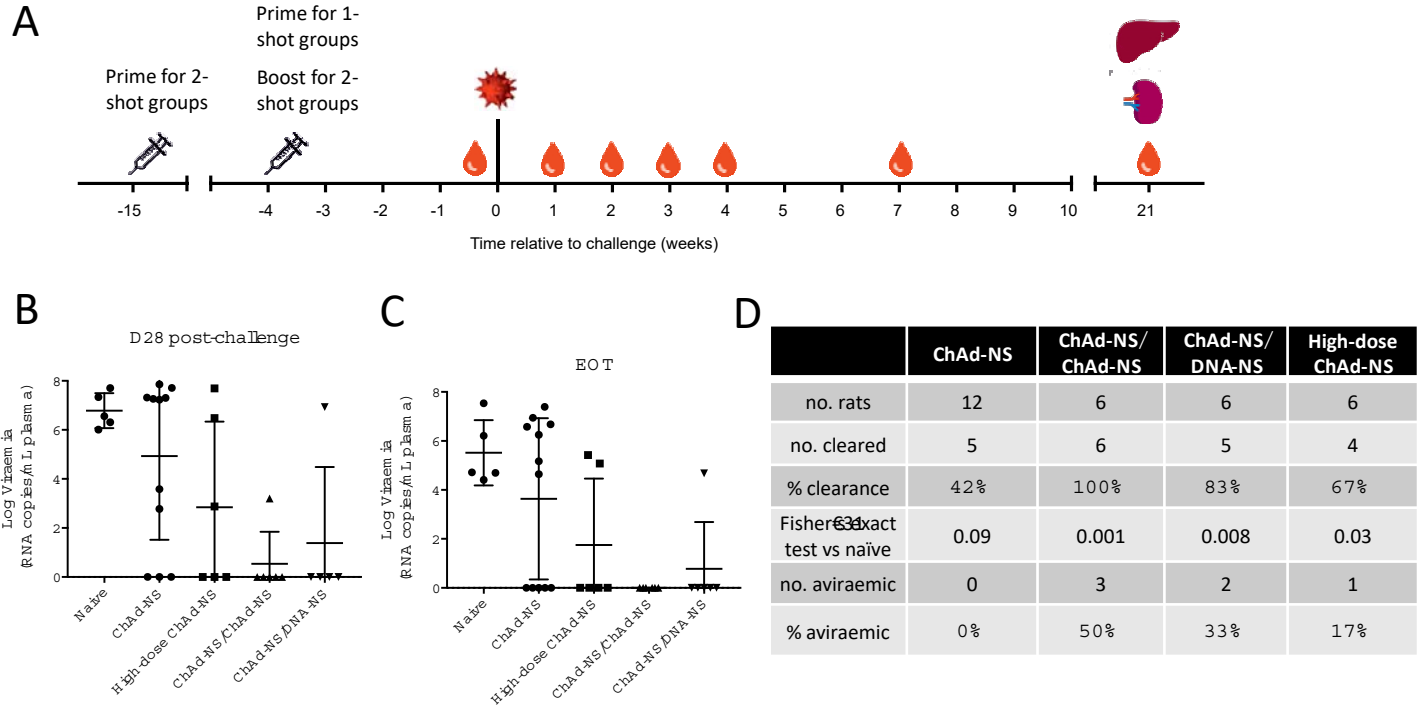

## Supplemental Figure 5: Schema and summary of protective efficacy of ChAd-NS vaccination on strategies against challenge with RHV

Male Sprague-Dawley rats ( $n=6$  per group) were vaccinated and challenged as described in Table 1. Vaccinations were administered by intramuscular injection into the right leg. Four weeks following vaccination RHV was administered by intravenous injection into a tail vein as shown in (A). Viraemia at each time-point obtained by quantitative PCR against a standard curve of RHV genomes of known concentration. Viraemia at (B) 28 days post-challenge and (C) at end of trial (approx. 150 days post-infection). (D) Summary of protective efficacy and aviraemia seen in each vaccination group.

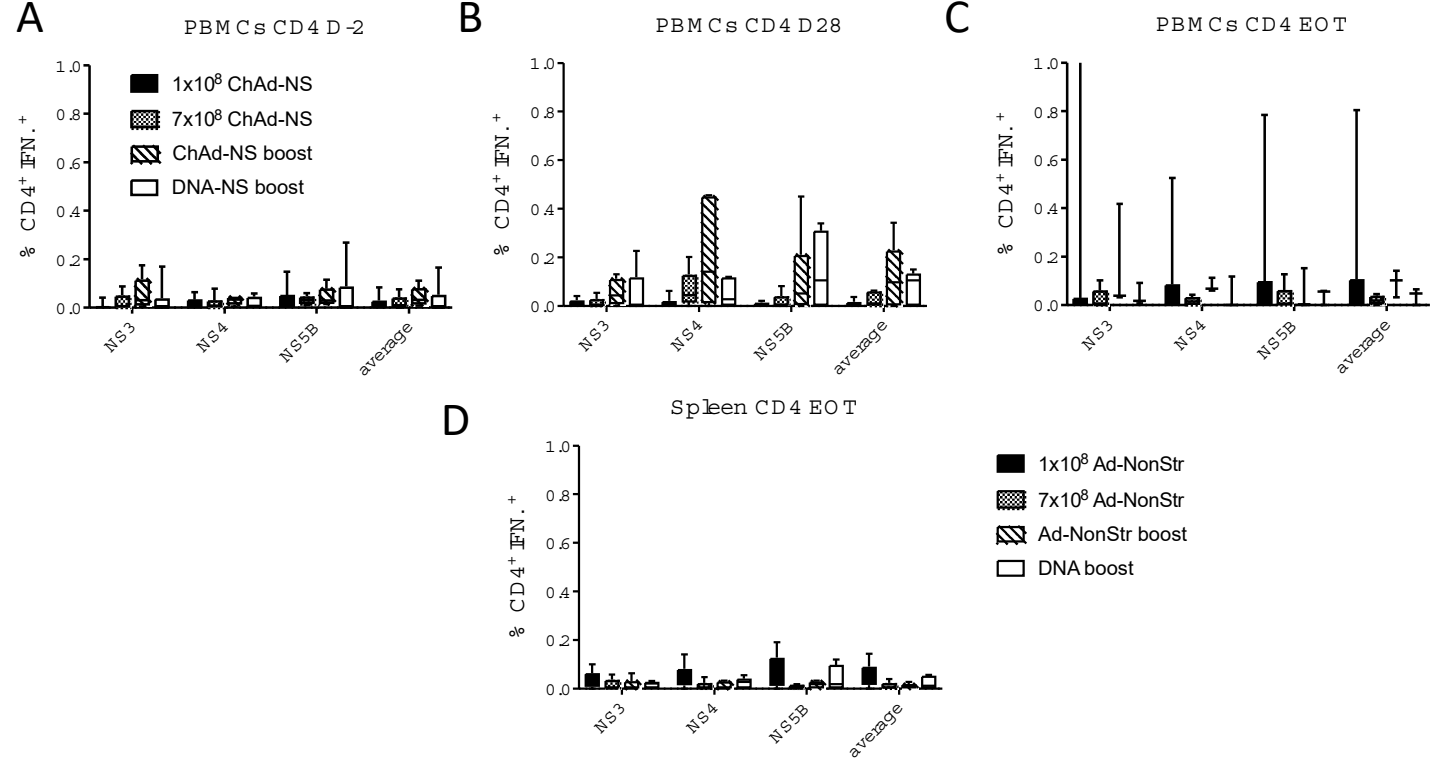

**Supplemental Figure 6: Efficacy on CD4<sup>+</sup>IFN<sup>+</sup> cellular immunogenicity of different vaccination regimes**  
 Male Sprague-Dawley rats (n=6 per group) were vaccinated and challenged four weeks after the final vaccination as described in Table 1. CD4<sup>+</sup>IFN<sup>+</sup> responses from PBMCs are shown (A) two days prior to infection (B) four weeks post-infection and (C) at end of study, and (D) for splenocytes at end of study.

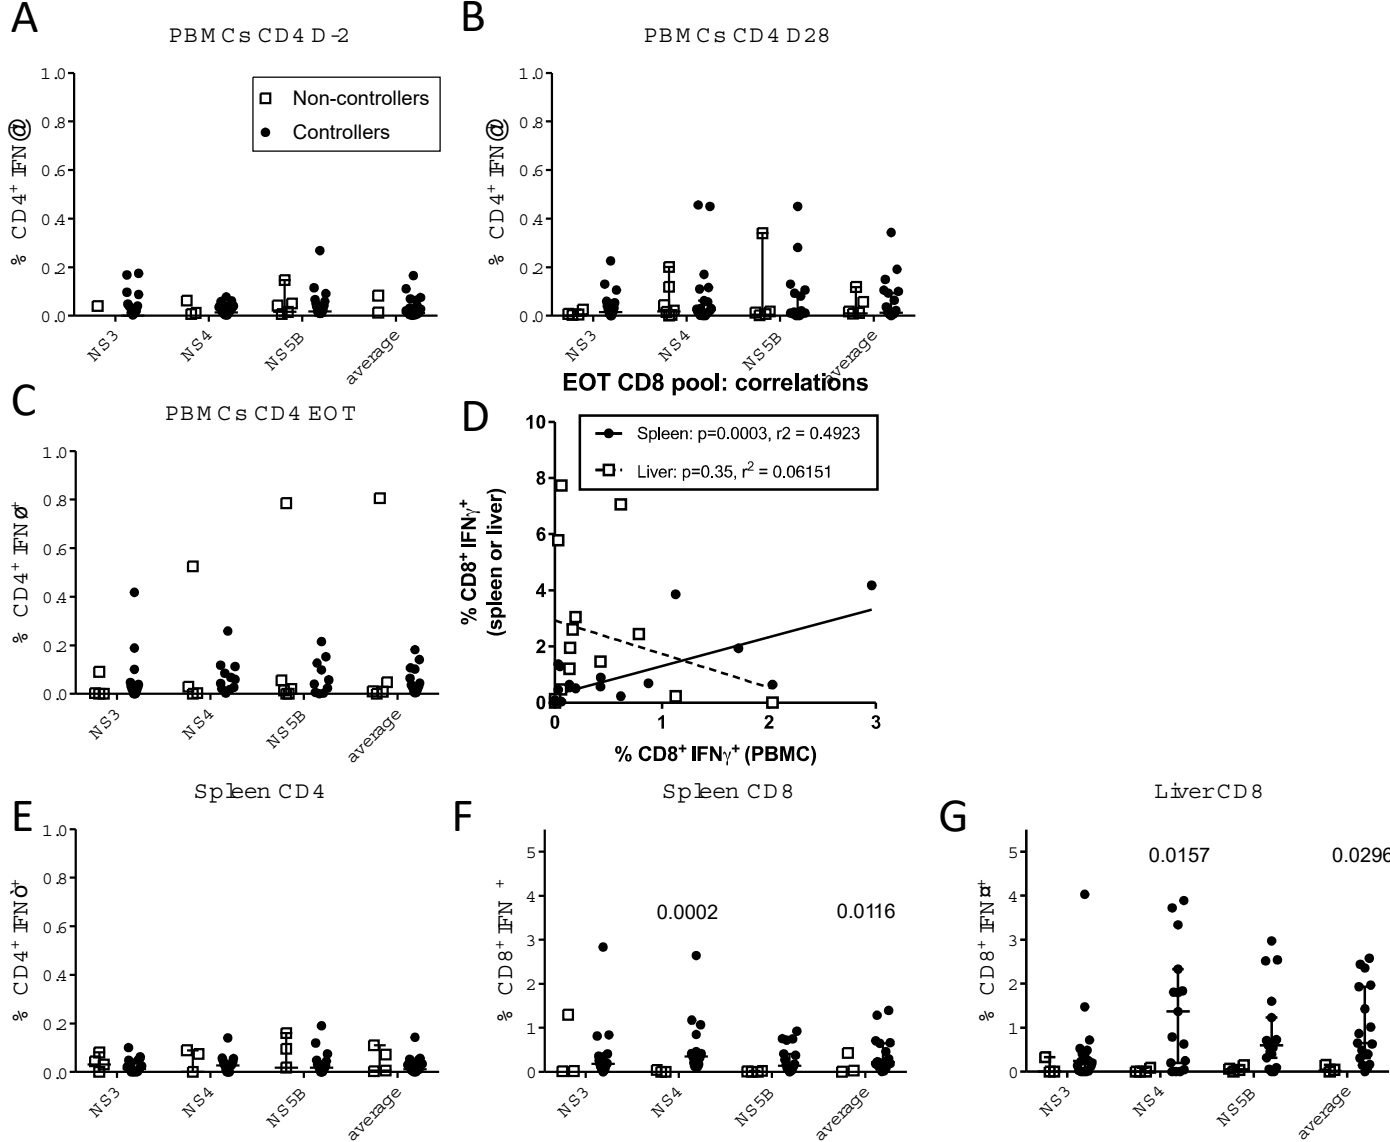

### Supplemental Figure 7: Association of CD4<sup>+</sup>IFN̳<sup>+</sup> and CD8<sup>+</sup>IFN̳<sup>+</sup> cellular immune responses with protecyon

Male Sprague-Dawley rats (n=6 per group) were vaccinated and challenged four weeks after the first vaccination as described in Table 1. Rats were divided into two groups, "controllers" and "non-controllers", on the basis of possessing detectable viraemia or otherwise at end of trial. Associations of CD4<sup>+</sup>IFN̳<sup>+</sup> responses from PBMCs are shown (A) two days prior to infection (B) four weeks post-infection and (C) at end of study. (D) Correlations between CD8<sup>+</sup>IFN̳<sup>+</sup> liver-infiltrating lymphocyte or splenocyte responses and PBMC responses at EOT. (E) CD4<sup>+</sup>IFN̳<sup>+</sup> and (F) CD8<sup>+</sup>IFN̳<sup>+</sup> responses at end of study are shown for splenocytes and (G) liver-infiltrating lymphocytes.

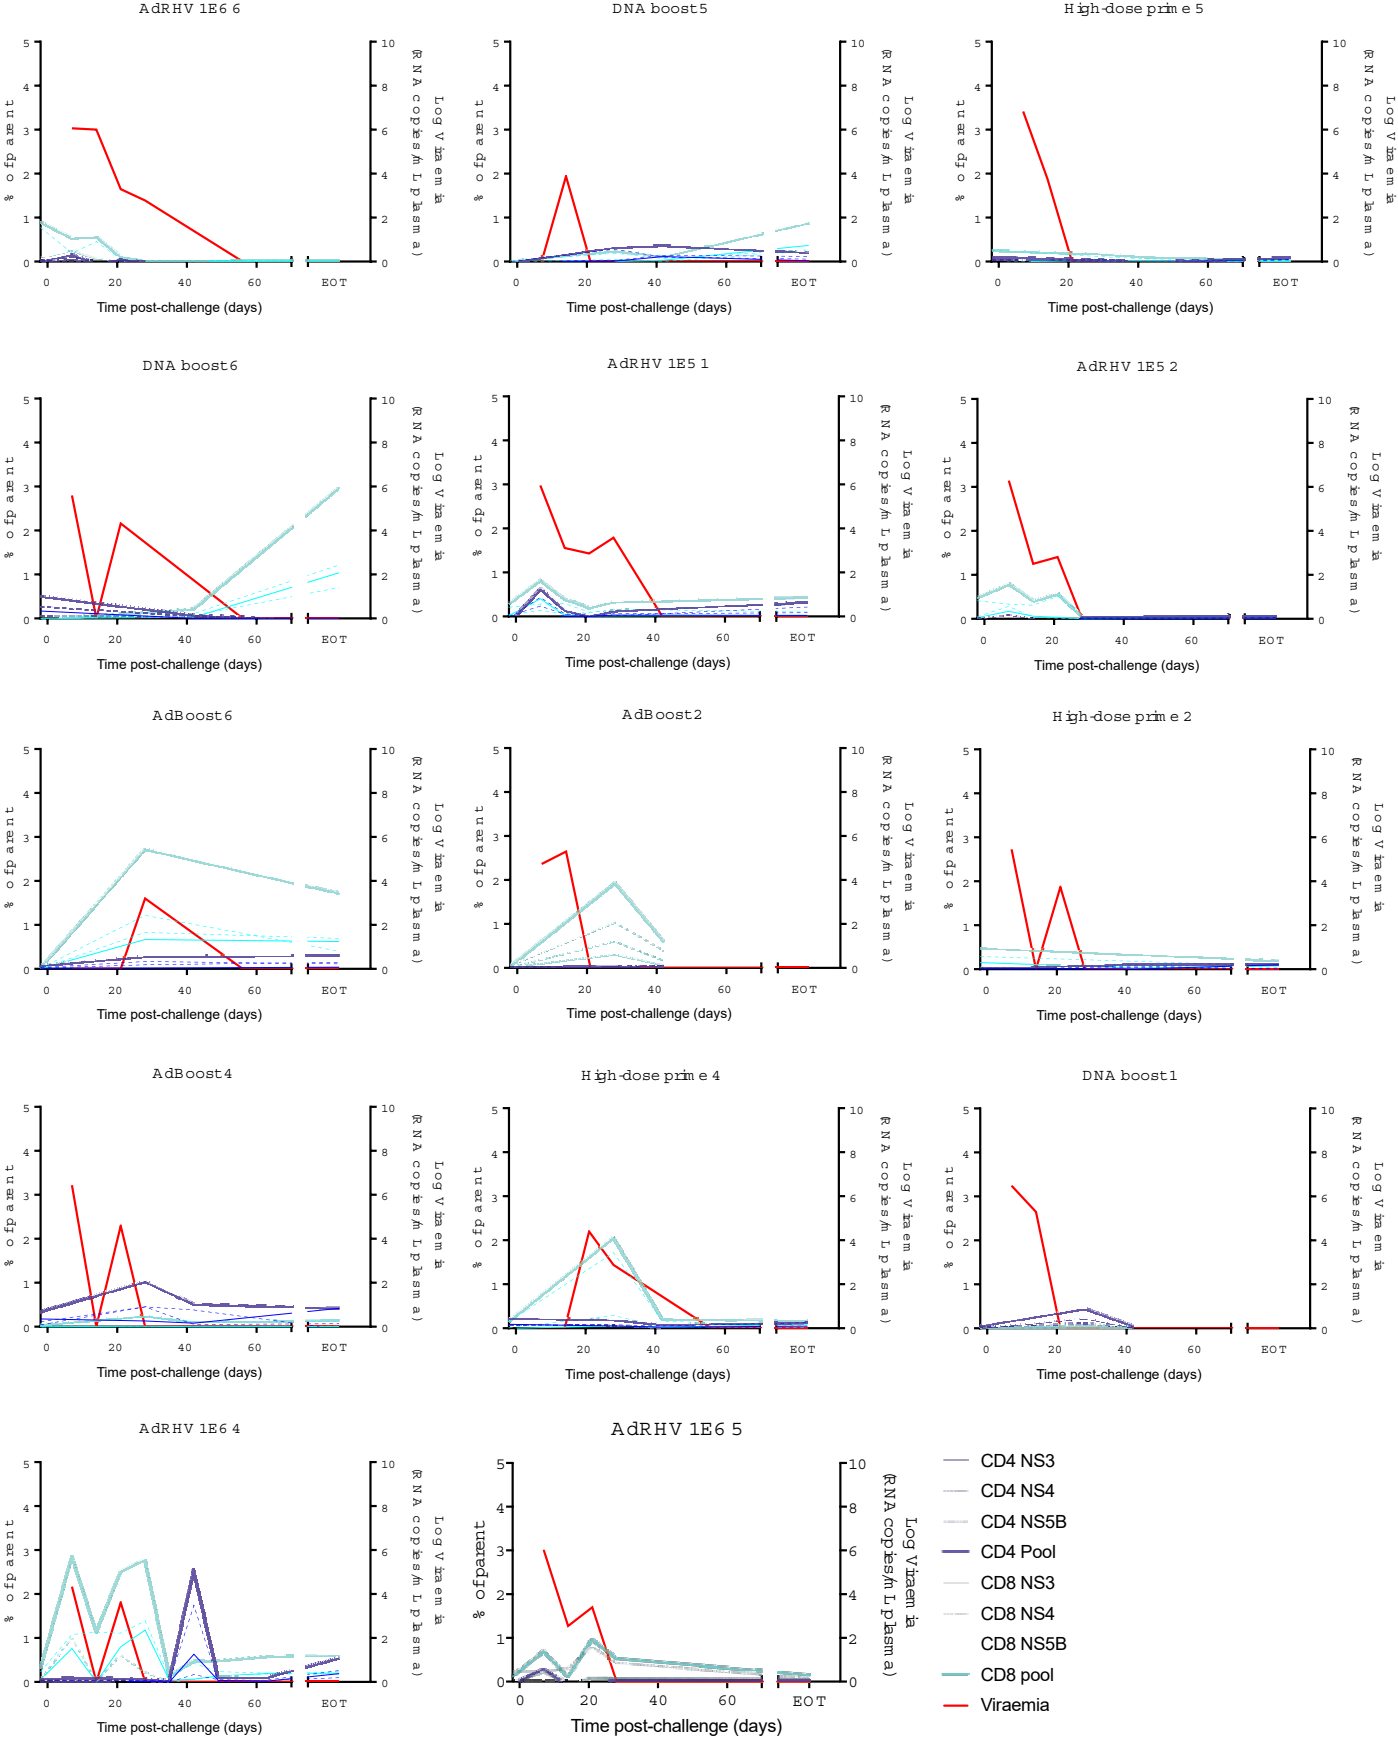

**Supplemental Fig 8: Individual time-course of viraemia and blood cellular immune responses in ChAd-NS-vaccinated and challenged rats which controlled infection**

Male Sprague-Dawley rats were vaccinated and challenged as described in Table 2. Blood cellular immune responses were obtained at each time-point by flow cytometry by stimulation with pools of peptides representing three regions, NS3, NS4 and NS5B. Viraemia was obtained by qPCR against a standard curve of RHV genome copies of known concentration on serum samples at indicated time-points.

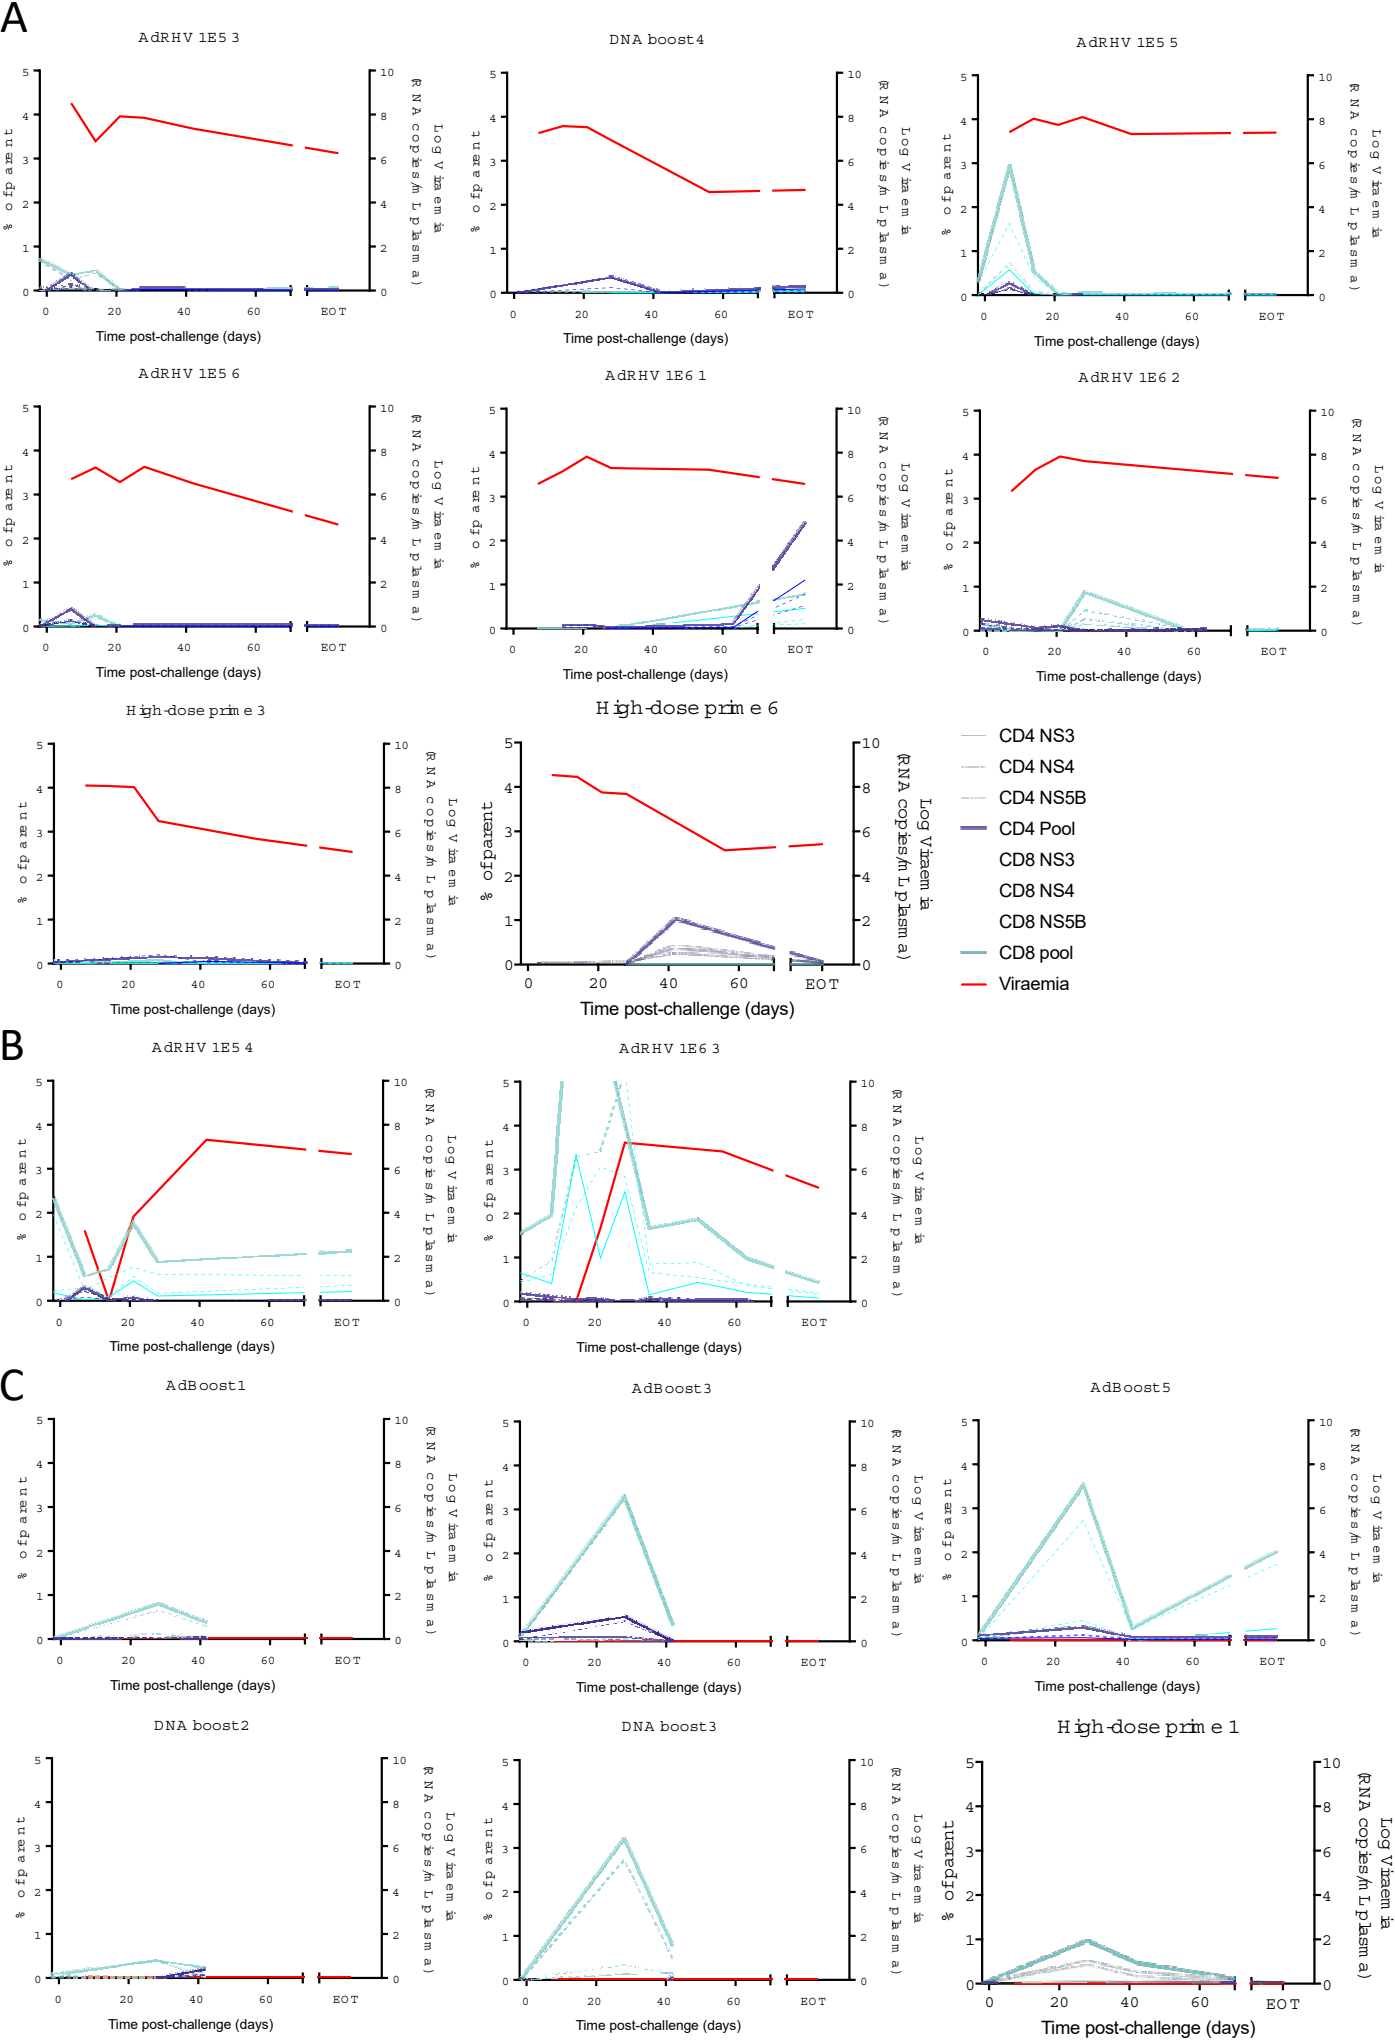

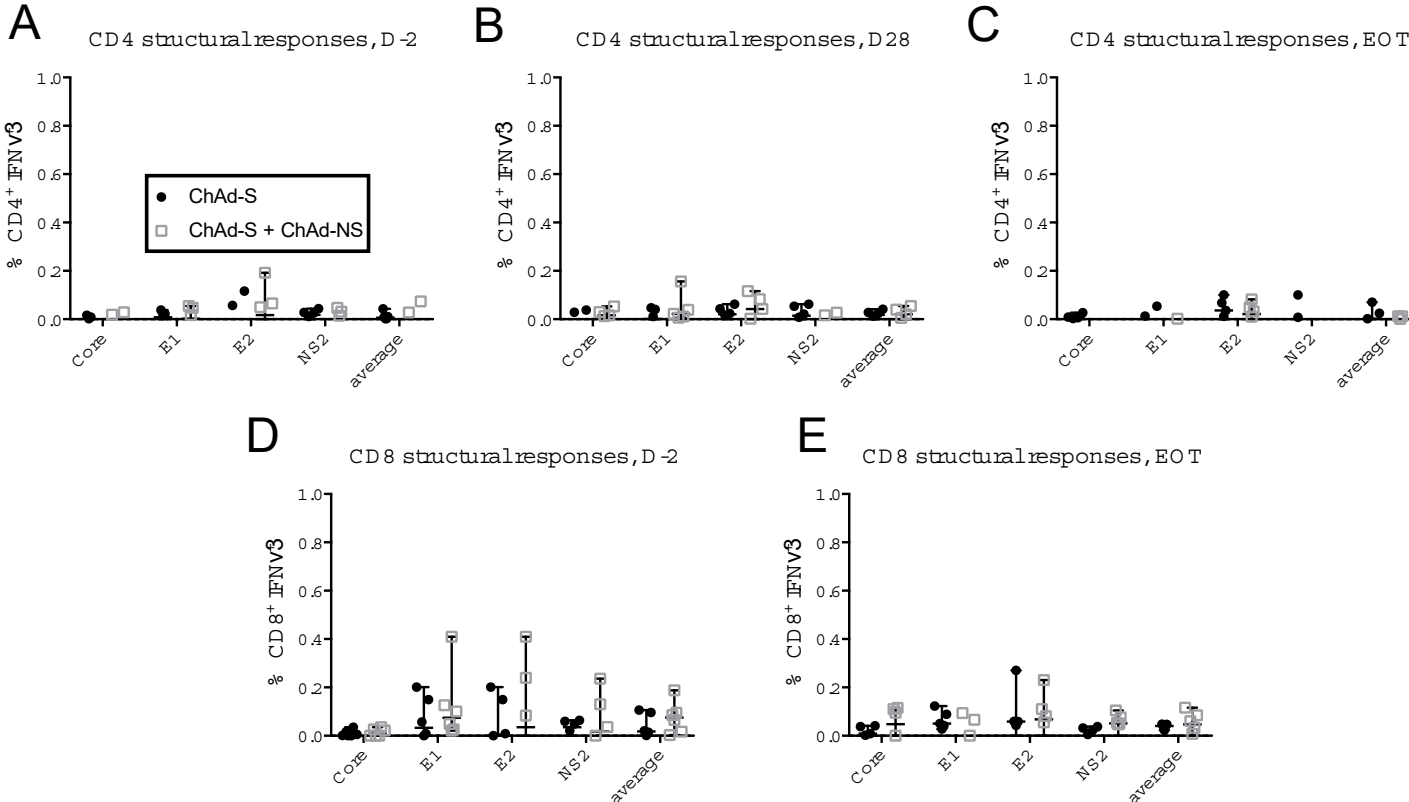

Supplemental Figure 10: Blood cellular immunogenicity against structural antigens of ChAdS alone and in combination with ChAdNS. Male Sprague Dawley rats (n=6 per group) were vaccinated by intramuscular injection with either ChAdS, ChAdNS or pre-mixed ChAdS and ChAdNS at a dose of  $10^8$  i.u. per distinct vaccine. Four weeks following vaccination rats were challenged by intravenous injection into the tail vein of  $10^5$  viral particles RHV. Blood cellular immuneresponses were compared by flow cytometry against structural antigens for single-vaccine versus combination groups for (A-C) CD4<sup>+</sup>IFN $\gamma$ 3 and (D-E) CD8<sup>+</sup>IFN $\gamma$ 3 cell types at timepoints indicated.

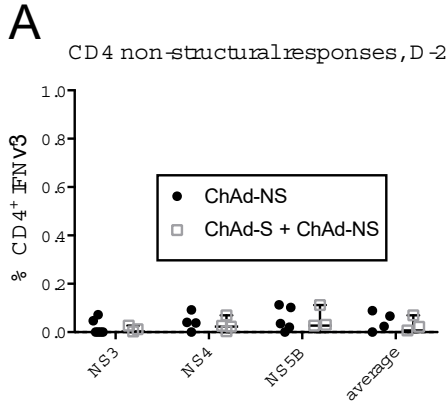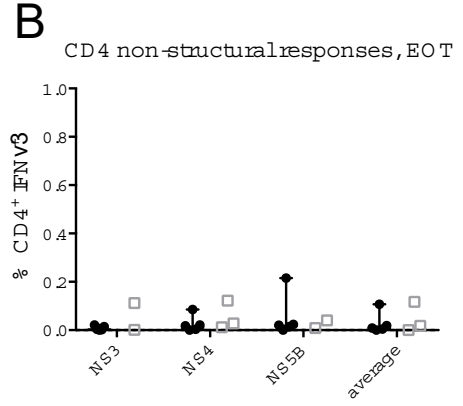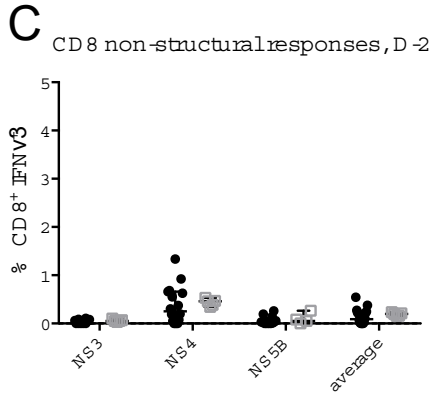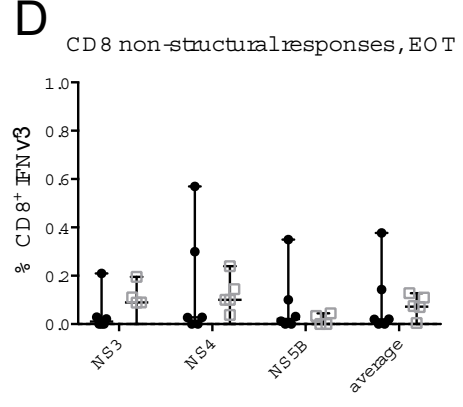

Supplemental Figure 11: B cell cellular immunogenicity against non-structural antigens of ChAdS alone and in combination with ChAdNS. Male Sprague Dawley rats (n=6 per group) were vaccinated by intramuscular injection with either ChAdS, ChAdNS or pre-mixed ChAdS and ChAdNS at a dose of  $10^8$  i.u. per distinct vaccine. Four weeks following vaccination rats were challenged by intravenous injection into the tail vein of  $10^5$  viral particles RHV. Blood cellular immune responses were compared by cytometry against non-structural antigens for single-vaccine versus combination groups for (A-B) CD4IFN $\gamma$ 3 and (C-D) CD8IFN $\gamma$ 3 cell types at time points indicated. Numbers above comparison groups represent p-values from ANOVA with Bonferroni's multiple comparison test.



**A** CD8 structural responses, spleen EOT

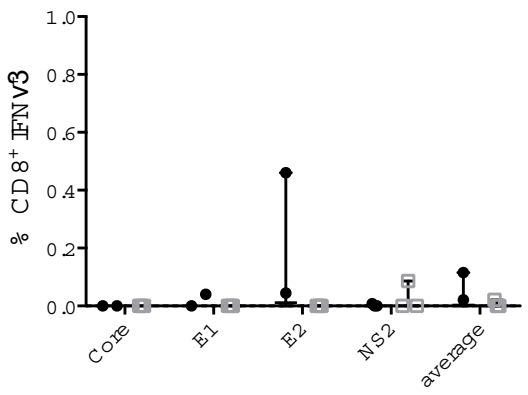

**B** CD8 non-structural responses, spleen EOT

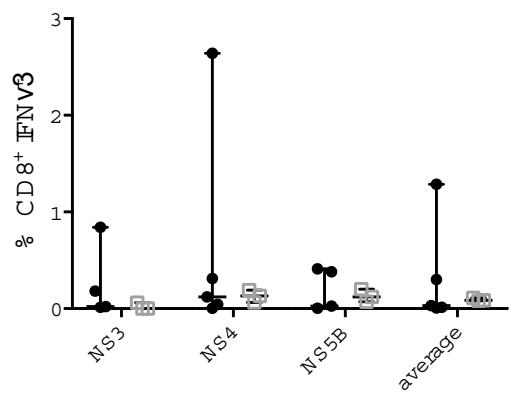

Supplemental Figure 12: Spleen cellular immune responses against ChAdS alone and in combination with ChAdNS

Male Sprague Dawley rats (n=6 per group) were vaccinated by intramuscular injection with either ChAdS, ChAdNS or pre-mixed ChAdS and ChAdNS at a dose of  $10^8$  i.u. per distinct vaccine. Four weeks following vaccination rats were challenged by intravenous injection into the tail vein of  $10^5$  viral particles RHV. CD8<sup>+</sup>IFN $\gamma$ <sup>+</sup> splenocyte cellular immune responses were compared by cytometry against (A) structural and (B) non-structural antigens for single-vaccine versus combination groups at EOT by cytometry.

**Supplemental Tables****Supplemental Table 1: Sequences of immunodominant CD8<sup>+</sup> peptides from ELISpot screen**

| RHV protein | Peptide no. | Sequence        |
|-------------|-------------|-----------------|
| Core        | 14          | GTLGWTADLLHHVPL |
| NS3         | 9           | TPAEVATHLSFYHNQ |
| NS4B        | 7 & 8       | AANLGAMVGHAFITY |

8 **Supplemental Table 2: Mutations in putative T-cell epitopes in two naive and one**  
 9 **vaccinated rat demonstrating breakthrough infection**

| Naïve <sup>1</sup> | Naïve | Vaccinated | WT <sup>2</sup>             | Mutant                      | aa position |
|--------------------|-------|------------|-----------------------------|-----------------------------|-------------|
| x                  |       |            | K <u>K</u> NQTKSVL          | K <u>K</u> NQKKSVL          | 109         |
| x                  |       | x          | S <u>A</u> FGTVAR <u>F</u>  | S <u>A</u> FGTVAR <u>L</u>  | 291         |
|                    |       | x          | S <u>H</u> YITLAA <u>I</u>  | S <u>H</u> YITLAA <u>V</u>  | 425         |
| x                  | x     | x          | A <u>A</u> VAAPV <u>S</u> M | A <u>A</u> VAAPV <u>T</u> K | 454         |
| x                  | x     | x          | V <u>A</u> NGVNTSR          | V <u>A</u> KGVNTSR          | 496         |
|                    |       | x          | A <u>S</u> QWARLP <u>G</u>  | A <u>L</u> QWARLP <u>G</u>  | 630         |
|                    |       | x          | R <u>A</u> VIIYIVCL         | R <u>A</u> AIYIVCL          | 745         |
| x                  | x     | x          | P <u>V</u> YARLGK <u>T</u>  | P <u>V</u> YARLGK <u>S</u>  | 959         |
|                    |       | x          | E <u>V</u> ATHLSFY          | E <u>A</u> ATHLSFY          | 1482*       |
|                    |       | x          | M <u>V</u> GHAFLTY          | M <u>A</u> GHVLLTY          | 1780*       |
| x                  | x     | x          | P <u>A</u> FLWDEVE          | P <u>V</u> FLWDEVE          | 2249        |
| x                  | x     | x          | P <u>V</u> RQPK <u>P</u> KP | P <u>V</u> RQPK <u>S</u> KP | 2351        |
|                    |       | x          | N <u>N</u> YKIPVA <u>K</u>  | N <u>N</u> YKIPVA <u>R</u>  | 2861        |
|                    |       | x          | L <u>R</u> YKRAAR           | L <u>R</u> HYKRAAR          | 2902        |

10 <sup>1</sup> 'x' marks mutations present in RHV isolated from that rat

11 <sup>2</sup> Residues in red denote mutation sites

12

13

14

**Supplemental Table 3: Antibodies used in flow cytometry**

|                               | <b>Marker/Fluorochrome</b>              | <b>Dilution</b> | <b>Source</b>     |
|-------------------------------|-----------------------------------------|-----------------|-------------------|
|                               | CD3-APC                                 | 1:125           | ebioscience       |
| <b>Surface staining</b>       | CD8-PerCP eFluor710                     | 1:200           | Invitrogen        |
| <b>cocktail</b>               | Live/Dead, Fixable Aqua dead cell stain | 1:150           | Life Technologies |
| <b>Intracellular staining</b> | CD4-APC Cy7                             | 1:25            | BD Pharmingen     |
| <b>cocktail</b>               | IFN $\gamma$ -FITC                      | 1:10            | Biolegend         |

15

16
